# Supplementary material for: The Clinical Features and Immunological Signature of Cyclospora cayetanensis Co-Infection among People Living with HIV in Ghana
Source: MDPI journal article supplement (doi:10.3390/microorganisms10071407), 2022-07-13
Supplement: s1 [file s1]

# **Supplementary Figure S1**

(a) Multiple logistic regression model displaying parameters associated with *C. cayetanensis* carriage in HIV positive participants. (b) Multiple linear regression model displaying parameters associated with an increase of HLA-DR+CD38+CD4+ (%) in HIV positive participants. Due to graphical restrictions of the 'forestmodel' package in R, the term "*C. cayetanensis*" is displayed in plain letters.

## **a. Factors associated with *C. cayetanensis* status**

| Variable                      | N   | Odds ratio        | p    |
|-------------------------------|-----|-------------------|------|
| Age in years                  | 604 | 0.98 (0.94, 1.01) | 0.16 |
| Sex                           |     |                   |      |
| female                        | 447 | Reference         |      |
| male                          | 157 | 1.45 (0.75, 2.74) | 0.26 |
| CD4+ T cell count in cells/μl |     |                   |      |
| ≥200                          | 426 | Reference         |      |
| <200                          | 178 | 2.11 (1.17, 3.79) | 0.01 |
| Co-trimoxazole prophylaxis    |     |                   |      |
| no                            | 403 | Reference         |      |
| yes                           | 201 | 0.69 (0.35, 1.29) | 0.26 |

## **b. Factors associated with HLA-DR+CD38+CD4+ (%)**

| Variable                      | N   | Estimate            | p      |
|-------------------------------|-----|---------------------|--------|
| Age in years                  | 270 | -0.00 (-0.18, 0.17) | 0.99   |
| Sex                           |     |                     |        |
| female                        | 195 | Reference           |        |
| male                          | 75  | 2.92 (-0.86, 6.70)  | 0.13   |
| CD4+ T cell count in cells/μl |     |                     |        |
| ≥200                          | 198 | Reference           |        |
| <200                          | 72  | 13.63 (9.86, 17.40) | <0.001 |
| Co-trimoxazole prophylaxis    |     |                     |        |
| no                            | 183 | Reference           |        |
| yes                           | 87  | 1.97 (-1.54, 5.49)  | 0.27   |
| Cyclospora cayetanensis       |     |                     |        |
| no                            | 246 | Reference           |        |
| yes                           | 24  | 7.46 (1.65, 13.27)  | 0.01   |
